# Supplementary material
Source: publisher figshare collection journal article supplement (https://acs.figshare.com/ndownloader/files/3959320)
Supplement: Supplementary file 1 [file 3959320]

# Increase in Activity and Selectivity in Catalysis via Surface Modification with Self-Assembled Monolayers

Zhihuan Weng and Francisco Zaera\*

Department of Chemistry, University of California, Riverside, CA 92507, USA

## Supporting Data

- Figure S1. Transmission Electron Microscopy (TEM) Images of Pt Nanoparticles
- Figure S2. X-ray Photoelectron Spectra (XPS) of C<sub>9</sub>H<sub>19</sub>S-Pt Nanoparticles
- Figure S3. Infrared (IR) Absorption Spectra in the S–H Stretching Region for Thiol Adsorption on Pt Nanoparticles
- Table S1. Initial TOFs from the Samples in Figure 1a.
- Table S2. Summary of Data from Analysis of the IR Absorption Spectra in Figure 2
- Figure S4. C<sub>9</sub>H<sub>19</sub>S-Pt/SiO<sub>2</sub> Catalyst Performance
- Figure S5. (C<sub>9</sub>H<sub>19</sub>S-Pt)/SiO<sub>2</sub> Catalyst Performance
- Figure S6. Kinetic Data for EtPy Conversion on C<sub>3</sub>H<sub>7</sub>S-Pt/Al<sub>2</sub>O<sub>3</sub> (a) and (Cid)C<sub>3</sub>H<sub>7</sub>S-Pt/Al<sub>2</sub>O<sub>3</sub> (b) Catalysts.
- Figure S7. (Cid)C<sub>x</sub>H<sub>2x</sub>S-Pt Catalyst Performance
- Figure S8. IR Absorption Spectra in the Hydrocarbon Deformation Region for Catalysts Prepared by Using Cinchonidine-Derivatized (Cid)C<sub>6</sub>H<sub>12</sub>SH Thiols.

**Figure S1. Transmission Electron Microscopy (TEM) Images of Pt Nanoparticles**

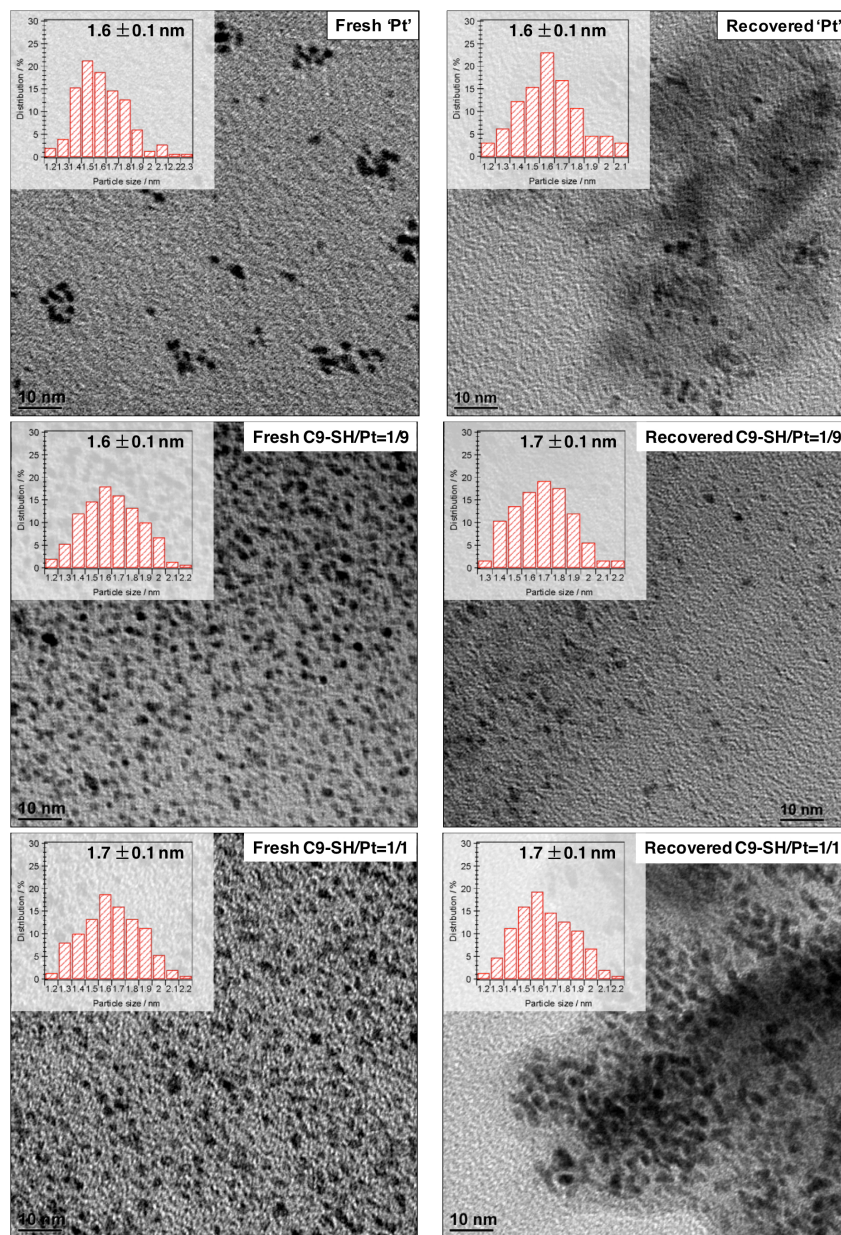

TEM images of Pt nanoparticles before (left) and after (right) being used for catalysis. Three sets of images are shown, for the "naked" nanoparticles (top), and for nanoparticles capped with 1-nonanethiol ( $\text{C}_9\text{H}_{19}\text{SH}$ ). Images for two thiol:Pt ratios are provided, 1:9 (center) and 1:1 (bottom). Each image is accompanied with a size distribution histogram. All particles display narrow size distributions around 1.6 - 1.7 nm.

**Figure S2. X-ray Photoelectron Spectra (XPS) of C<sub>9</sub>H<sub>19</sub>S-Pt Nanoparticles**

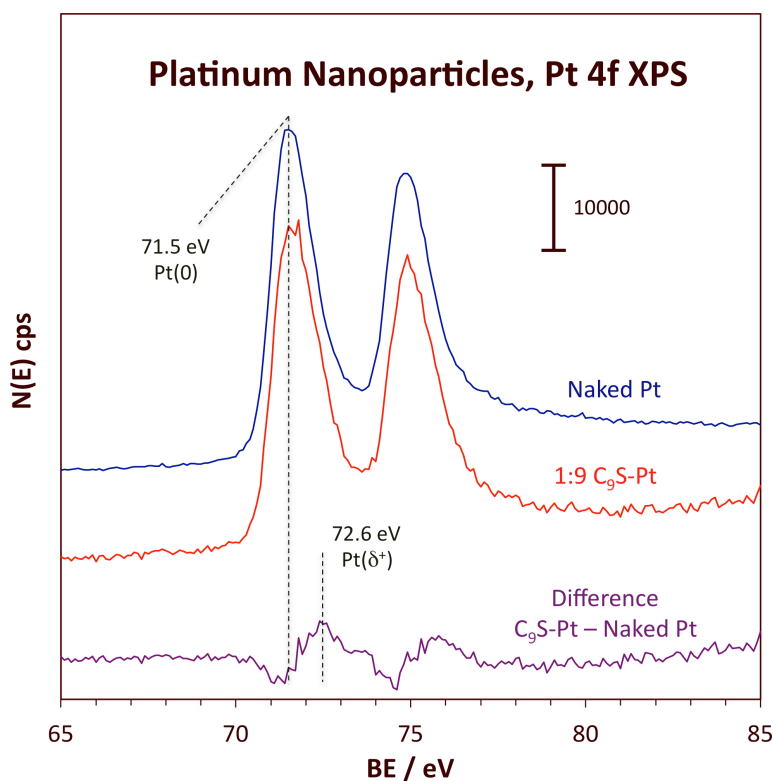

Pt 4f XPS for "naked" (blue) and thiol-treated (C<sub>9</sub>H<sub>19</sub>SH, red) platinum nanoparticles. A difference trace is also provided at the bottom (purple) to highlight the changes. The main Pt 4f<sub>7/2</sub> peak corresponds to metallic platinum, Pt(0), whereas the shoulder that develops at 72.6 eV upon thiol adsorption corresponds to partially-positively-charged platinum atoms, Pt(δ<sup>+</sup>) generated by bonding to the sulfur atoms. This is corroborated by the binding energy value measured for the S 2p peak at 162.5 eV, more than 1 eV lower than that of pure alkyl thiols and consistent with adsorption on the Pt surface.[Li, Z., Chang, S.-C., Williams, R. S., *Langmuir* 19 (2003) 6744-6749][Tu, W., Takai, K., Fukui, K-i., Miyazaki, A., Enoki, T., *J. Phys. Chem. B* 107 (2003) 10134-10140]

**Figure S3. Infrared (IR) Absorption Spectra in the S–H Stretching Region for Thiol Adsorption on Pt Nanoparticles**

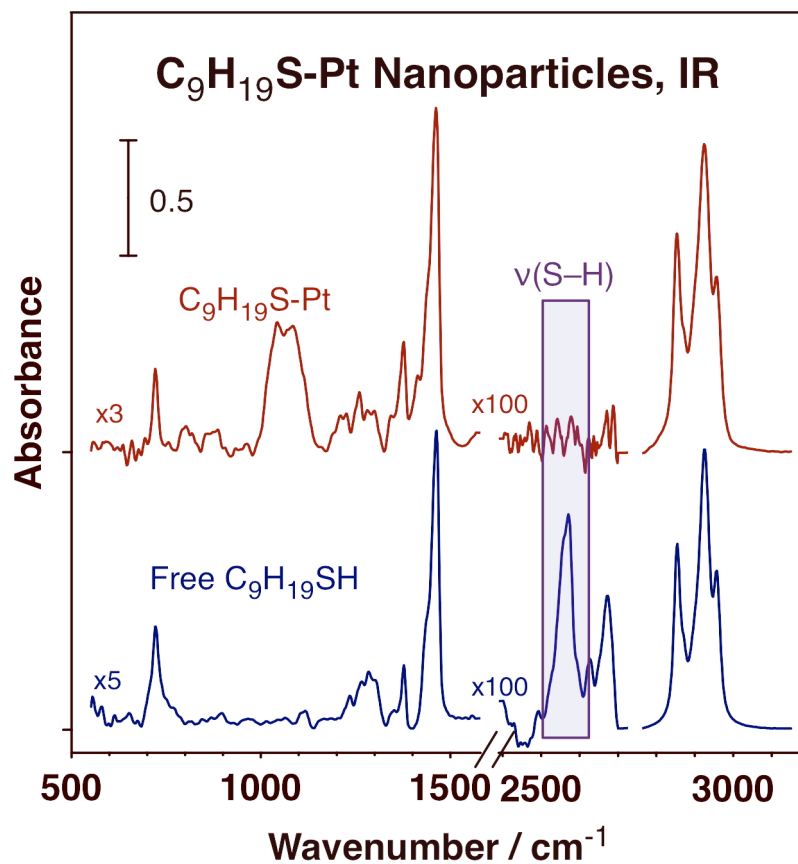

Infrared (IR) absorption spectra of  $\text{C}_9\text{H}_{19}\text{SH}$  free (blue) and adsorbed on Pt nanoparticles (red). The disappearance of the peak at  $2573\text{ cm}^{-1}$ , the one corresponding to the S–H bond stretching mode, corroborates the adsorption and the formation of thiol self-assembled layers on the Pt nanoparticles.



**Table S1. Initial TOFs from the Samples in Figure 1a.**

| Sample                               | TOF / molec Pt-atom <sup>-1</sup> s <sup>-1</sup> |
|--------------------------------------|---------------------------------------------------|
| Pt                                   | 0.0044                                            |
| Na <sub>2</sub> S-Pt                 | 0.0024                                            |
| C <sub>3</sub> H <sub>7</sub> S-Pt   | 0.0067                                            |
| C <sub>9</sub> H <sub>19</sub> S-Pt  | 0.0218                                            |
| C <sub>16</sub> H <sub>33</sub> S-Pt | 0.0315                                            |

**Table S2. Summary of Data from Analysis of the IR Absorption Spectra in Figure 2**

| Figure 2a |                                 | Free<br>C <sub>9</sub> H <sub>19</sub> SH | 6:1<br>C <sub>9</sub> H <sub>19</sub> S-Pt | 1:1<br>C <sub>9</sub> H <sub>19</sub> S-Pt | 1:3<br>C <sub>9</sub> H <sub>19</sub> S-Pt | 1:6<br>C <sub>9</sub> H <sub>19</sub> S-Pt | 1:9<br>C <sub>9</sub> H <sub>19</sub> S-Pt | 1:27<br>C <sub>9</sub> H <sub>19</sub> S-Pt |
|-----------|---------------------------------|-------------------------------------------|--------------------------------------------|--------------------------------------------|--------------------------------------------|--------------------------------------------|--------------------------------------------|---------------------------------------------|
| Peak 1    | Frequency / cm <sup>-1</sup>    | 2853.5                                    | 2853.5                                     | 2853.5                                     | 2853.5                                     | 2853.5                                     | 2853.5                                     | 2853                                        |
|           | Width / cm <sup>-1</sup>        | 15                                        | 15                                         | 17                                         | 23                                         | 22                                         | 22                                         | 18                                          |
|           | Intensity /abs cm <sup>-1</sup> | 1.53                                      | 1.28                                       | 1.28                                       | 1.88                                       | 1.59                                       | 1.63                                       | 1.66                                        |
| Peak 2    | Frequency / cm <sup>-1</sup>    | 2870.9                                    | 2870.9                                     | 2872                                       | 2875                                       | 2875                                       | 2876                                       | 2874                                        |
|           | Width / cm <sup>-1</sup>        | 13                                        | 11                                         | 15                                         | 15                                         | 15                                         | 15                                         | 14                                          |
|           | Intensity /abs cm <sup>-1</sup> | 0.48                                      | 0.30                                       | 0.40                                       | 0.39                                       | 0.27                                       | 0.38                                       | 0.44                                        |
| Peak 3    | Frequency / cm <sup>-1</sup>    | 2895                                      | 2895.8                                     | 2897                                       | 2897                                       | 2897                                       | 2898.5                                     | 2899                                        |
|           | Width / cm <sup>-1</sup>        | 25                                        | 26                                         | 26                                         | 26                                         | 26                                         | 26                                         | 26                                          |
|           | Intensity /abs cm <sup>-1</sup> | 1.20                                      | 1.15                                       | 1.20                                       | 1.62                                       | 1.29                                       | 1.52                                       | 1.65                                        |
| Peak 4    | Frequency / cm <sup>-1</sup>    | 2925                                      | 2925                                       | 2925                                       | 2924.5                                     | 2924.5                                     | 2924.5                                     | 2924.5                                      |
|           | Width / cm <sup>-1</sup>        | 24                                        | 22                                         | 22                                         | 23                                         | 23                                         | 22.5                                       | 21                                          |
|           | Intensity /abs cm <sup>-1</sup> | 3.61                                      | 3.35                                       | 3.17                                       | 3.11                                       | 3.25                                       | 3.17                                       | 3.37                                        |
| Peak 5    | Frequency / cm <sup>-1</sup>    | 2957.4                                    | 2957                                       | 2957                                       | 2956                                       | 2956                                       | 2955.8                                     | 2956                                        |
|           | Width / cm <sup>-1</sup>        | 19                                        | 18                                         | 22                                         | 25                                         | 21                                         | 28                                         | 21                                          |
|           | Intensity /abs cm <sup>-1</sup> | 1.56                                      | 1.13                                       | 1.56                                       | 1.94                                       | 1.42                                       | 1.78                                       | 1.34                                        |

| Figure 2b |                                 | 1:9<br>C <sub>16</sub> H <sub>33</sub> S-Pt | 1:9<br>C <sub>9</sub> H <sub>19</sub> S-Pt | 1:9<br>C <sub>3</sub> H <sub>7</sub> S-Pt | C <sub>16</sub> H <sub>33</sub> SH | C <sub>9</sub> H <sub>19</sub> SH |
|-----------|---------------------------------|---------------------------------------------|--------------------------------------------|-------------------------------------------|------------------------------------|-----------------------------------|
| Peak 1    | Frequency / cm <sup>-1</sup>    | 2852.9                                      | 2853.5                                     | 2853.5                                    | 2852.9                             | 2853.5                            |
|           | Width / cm <sup>-1</sup>        | 17                                          | 22                                         | 27                                        | 17                                 | 15                                |
|           | Intensity /abs cm <sup>-1</sup> | 1.55                                        | 1.47                                       | 2.13                                      | 1.93                               | 1.52                              |
| Peak 2    | Frequency / cm <sup>-1</sup>    | 2873.2                                      | 2876                                       | 2875                                      | 2874.2                             | 2870.9                            |
|           | Width / cm <sup>-1</sup>        | 15                                          | 15                                         | 16                                        | 12                                 | 13                                |
|           | Intensity /abs cm <sup>-1</sup> | 0.33                                        | 0.34                                       | 0.40                                      | 0.35                               | 0.47                              |
| Peak 3    | Frequency / cm <sup>-1</sup>    | 2895.9                                      | 2898.5                                     | 2896.5                                    | 2896.4                             | 2895                              |
|           | Width / cm <sup>-1</sup>        | 26                                          | 26                                         | 23                                        | 21                                 | 25                                |
|           | Intensity /abs cm <sup>-1</sup> | 1.27                                        | 1.36                                       | 1.31                                      | 1.16                               | 1.19                              |
| Peak 4    | Frequency / cm <sup>-1</sup>    | 2923.9                                      | 2924.5                                     | 2925                                      | 2923.9                             | 2925                              |
|           | Width / cm <sup>-1</sup>        | 22.5                                        | 22.5                                       | 25                                        | 22.5                               | 24                                |
|           | Intensity /abs cm <sup>-1</sup> | 3.34                                        | 2.85                                       | 3.37                                      | 3.50                               | 3.57                              |
| Peak 5    | Frequency / cm <sup>-1</sup>    | 2955.4                                      | 2955.8                                     | 2959                                      | 2956.9                             | 2957.4                            |
|           | Width / cm <sup>-1</sup>        | 21                                          | 28                                         | 21.5                                      | 25                                 | 19                                |
|           | Intensity /abs cm <sup>-1</sup> | 0.93                                        | 1.61                                       | 1.37                                      | 1.36                               | 1.55                              |

**Figure S4.  $C_9H_{19}S$ -Pt/SiO<sub>2</sub> Catalyst Performance**

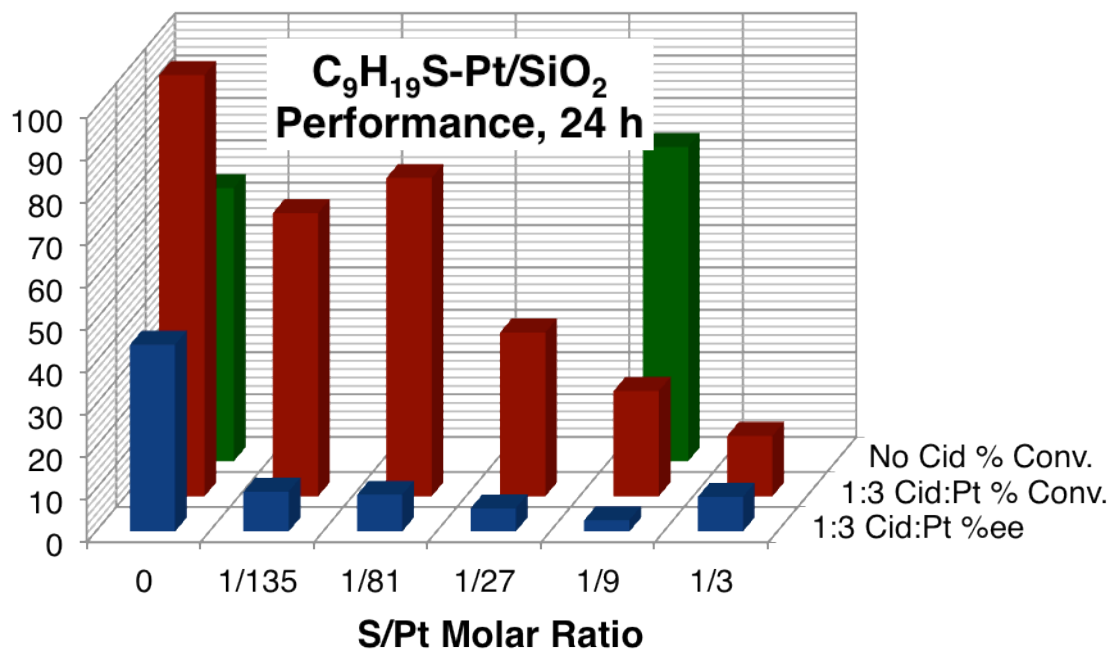

Activity (in %conversion after 24 h of reaction, red) and enantioselectivity (%ee, blue) of a thiol-pretreated commercial 1 wt% Pt/SiO<sub>2</sub> catalyst (Sigma-Aldrich) for the hydrogenation of ethyl pyruvate in the presence of cinchonidine (Cid) as a chiral modifier. The data are reported as a function of the concentration of C<sub>9</sub>H<sub>19</sub>SH used for pretreatment (expressed as a S:Pt molar ratio). Reaction conditions: 1.25 mmol ethyl pyruvate, 20 bar H<sub>2</sub>, 5 μmol Pt, 1.5 μmol cinchonidine, 10 ml toluene (solvent), 300 K. Both activity, and enantioselectivity in particular, decrease rapidly upon the addition of the thiols to the catalyst. Reference activity data are also provided for a couple of cases where no cinchonidine was added to the solution (green). In that case the thiols may enhance reactivity, but the reaction lacks enantioselectivity.

**Figure S5. (C<sub>9</sub>H<sub>19</sub>S-Pt)/SiO<sub>2</sub> Catalyst Performance**

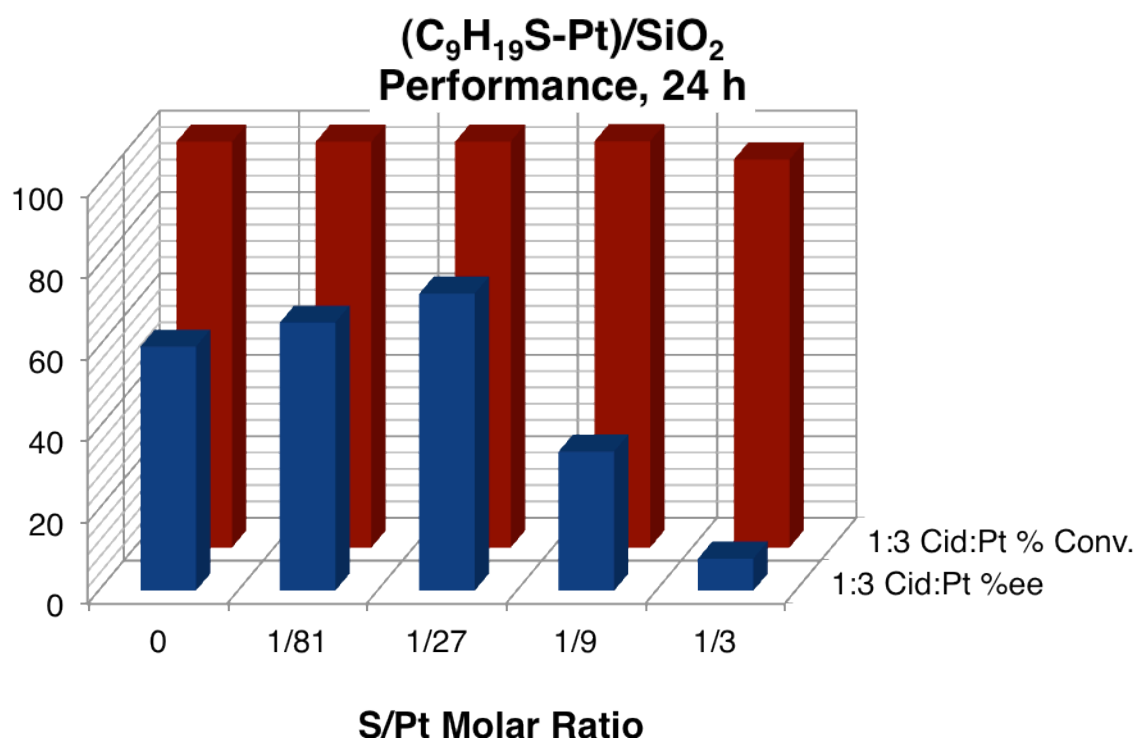

Catalytic activity (in %conversion after 24 h of reaction, red) and enantioselectivity (%ee, blue) for the hydrogenation of ethyl pyruvate in the presence of cinchonidine (Cid) as a chiral modifier. The experiments were carried out using catalysts prepared by dispersing the thiol-treated C<sub>9</sub>H<sub>19</sub>S-Pt nanoparticles on a commercial silica support (Aerosil 200, Degussa, surface area = 200 m<sup>2</sup>/g). The data are reported as a function of the concentration of C<sub>9</sub>H<sub>19</sub>SH used for pretreatment (expressed as a S:Pt molar ratio). Reaction conditions: 1.25 mmol ethyl pyruvate, 20 bar H<sub>2</sub>, 5 μmol Pt, 1.5 μmol cinchonidine, 10 ml toluene (solvent), 300 K. The performance in this case is optimum for a S:Pt ratio of approximately 1:27.

**Figure S6. Kinetic Data for EtPy Conversion on  $\text{C}_3\text{H}_7\text{S-Pt/Al}_2\text{O}_3$  (a) and  $(\text{Cid})\text{C}_3\text{H}_6\text{S-Pt/Al}_2\text{O}_3$  (b) Catalysts.**

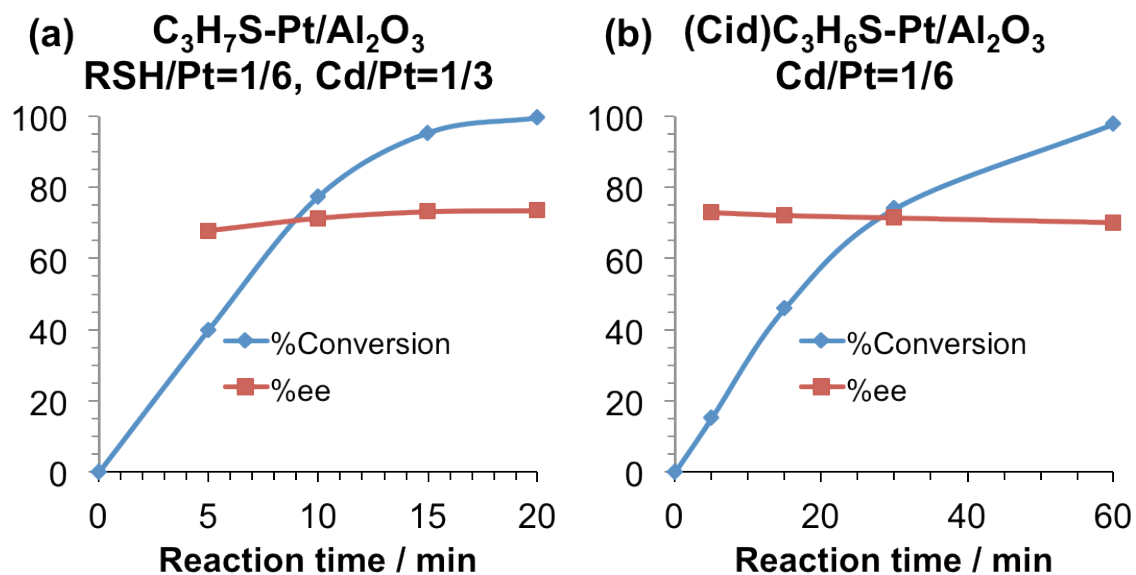

Catalytic conversion (% , blue) and enantioselectivity (%ee, red) kinetic data as a function of reaction time for the hydrogenation of ethyl pyruvate with two types of catalysts:  $\text{C}_3\text{H}_7\text{S-Pt/Al}_2\text{O}_3$  (a), and  $(\text{Cid})\text{C}_3\text{H}_6\text{S-Pt/Al}_2\text{O}_3$  (b).



**Figure S7. (Cid) $C_xH_{2x}S$ -Pt Catalyst Performance**

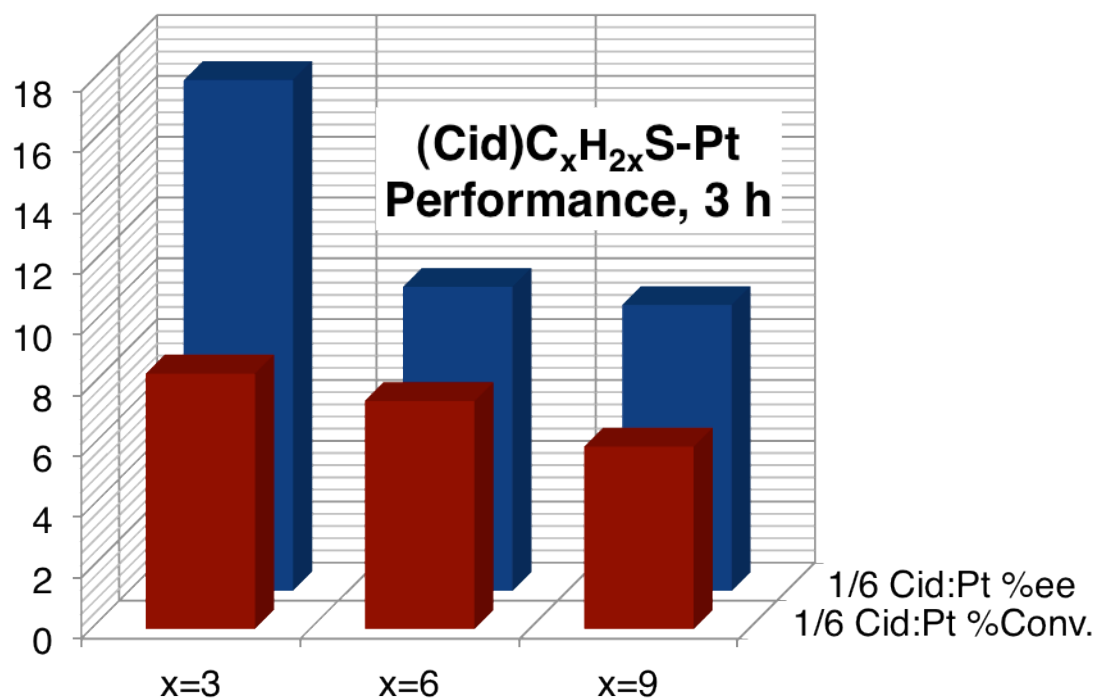

Catalytic activity (in %conversion after 3 h of reaction, red) and enantioselectivity (%ee, blue) for the hydrogenation of ethyl pyruvate with catalysts prepared by depositing Cid-derivatized thiol SAMs on Pt nanoparticles. The data are reported as a function of the length of the alkyl chain in the thiol SAMs. Reaction conditions: 1.25 mmol ethyl pyruvate, 20 bar  $H_2$ , 5  $\mu$ mol Pt, 1.5  $\mu$ mol cinchonidine, 10 ml toluene (solvent), 300 K. These samples all show poor catalytic performance.

**Figure S8. IR Absorption Spectra in the Hydrocarbon Deformation Region for Catalysts Prepared by Using Cinchonidine-Derivatized (Cid)C<sub>6</sub>H<sub>12</sub>SH Thiols.**

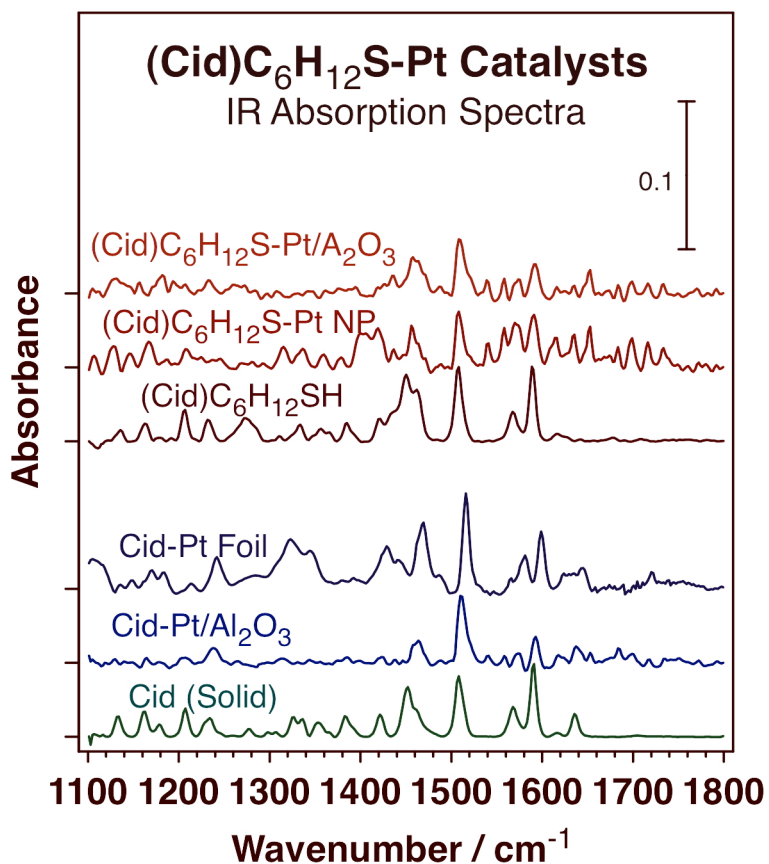

IR traces for, from bottom to top: solid cinchonidine (green), cinchonidine adsorbed on Pt/Al<sub>2</sub>O<sub>3</sub> (blue), cinchonidine adsorbed on a Pt foil (dark blue), free (Cid)C<sub>6</sub>H<sub>12</sub>SH (dark red), (Cid)C<sub>6</sub>H<sub>12</sub>SH adsorbed on Pt nanoparticles (red), and (Cid)C<sub>6</sub>H<sub>12</sub>SH adsorbed on Pt/Al<sub>2</sub>O<sub>3</sub> (brick color). These results correspond to experiments carried out with a Pt/Al<sub>2</sub>O<sub>3</sub> (instead of Pt/SiO<sub>2</sub>) catalysts and a shorter thiol than in Figure 6, but the results and general conclusions are similar.
